# Supplementary material
Source: PubMed Central journal article supplement (PMC5429184)

## 991 SUPPORTING INFORMATION

992 **Table 1: List of oligonucleotides used in this study.** All oligonucleotides were purchased from  
 993 Integrated DNA Technologies. Restriction sites are underlined, InFusion overhangs are  
 994 italicized, gRNA sequence is in lowercase.

| Primer number | Oligonucleotide sequence                                                                                                                                                                       |
|---------------|------------------------------------------------------------------------------------------------------------------------------------------------------------------------------------------------|
| 1             | <i>CGATTTTTCTCGAGATGTCTTTGAGTATTTATGG</i>                                                                                                                                                      |
| 2             | <i>ATGTGCTGCACCTGGCCTAGGTGGTTCTTCTCCATCTTACGC</i>                                                                                                                                              |
| 3             | <i>CGATTTTTCTCGAGATGAATTCTGTTATGCCTG</i>                                                                                                                                                       |
| 4             | <i>ATGTGCTGCACCTGGCCTAGGCATTCCTGATCTTTTTCTTGG</i>                                                                                                                                              |
| 5             | <i>CGATTTTTCTCGAGATGTTAAAAAATCCAGGTAC</i>                                                                                                                                                      |
| 6             | <i>ATGTGCTGCACCTGGCCTAGGAAATTCATTTTTGATTG</i>                                                                                                                                                  |
| 7             | <i>CGATTTTTCTCGAGATGGCAGAAGTAGCAA</i>                                                                                                                                                          |
| 8             | <i>ATGTGCTGCACCTGGCCTAGGTCTACAAATAACTGTGTCATC</i>                                                                                                                                              |
| 9             | <i>CGATTTTTCTCGAGATGAATATTGCTATTGATGAG</i>                                                                                                                                                     |
| 10            | <i>ATGTGCTGCACCTGGCCTAGGATTGAAGTCGTTTGGAGC</i>                                                                                                                                                 |
| 11            | <i>CGATTTTTCTCGAGATGTCCATACACCTGTTGAAC</i>                                                                                                                                                     |
| 12            | <i>ATGTGCTGCACCTGGCCTAGGTTTCTCCTCTCCCATTTGATTTCCC</i>                                                                                                                                          |
| 13            | <i>CGATTTTTCTCGAGATGAGTCACTTAATG</i>                                                                                                                                                           |
| 14            | <i>ATGTGCTGCACCTGGCCTAGGTGAGTAAGGACTTCTC</i>                                                                                                                                                   |
| 15            | <i>CGATTTTTCTCGAGATGGTAAGCTAAGTTTGG</i>                                                                                                                                                        |
| 16            | <i>ATGTGCTGCACCTGGCCTAGGGAAGGCTTCGTCATAGTCAG</i>                                                                                                                                               |
| 17            | AACGGTAAAAATAATAACACGAATTATCAC                                                                                                                                                                 |
| 18            | TATTCATCTATTTATGGACAATGG                                                                                                                                                                       |
| 19            | CCTATATGCACATATTCATATTAAGTATATAATATTCCTAGGAACTCATCG<br>CTCGGATGCTGCCCGACAGTTTTAGAGCTAGAAATAGCAAGTTAAAATAA<br>GGCTAGTCCGTTATCAACTTGAAAAAGTGGCACCGAGTCGGTGCTTTTTTAT<br>TATTCCTATAAAAATAATATATATA |
| 20            | <i>ACGATTTTTCTCGAGATGGACAAGAAGTACAGCATCGGC</i>                                                                                                                                                 |
| 21            | <i>CCTTGTAGTCCCTAGGCACTTTCCGCTTTTTCTTAGGATCTTCCACCTTGCGT<br/>TTTTCTTGGGGTCGCCTCCAGCTGAGACAGGTC</i>                                                                                             |
| 22            | CTTTGTTGACTTGTGGTGTGTTGAAGAAAATCCAGGTCCAGACAAGAAGT<br>ACAGCATCG                                                                                                                                |
| 23            | <i>TGCCATATCCCTCGAGT</i> ACTTGTGTCGTCGTCGTCCTTGTAGTCCACTTTCCGC<br>TTTTTCT                                                                                                                      |
| 24            | <i>CGATATGAATTCTAGAC</i> ATTTTGTAATAAAAAAATTAATAATATATTTATATAAT<br>ATTATTTT                                                                                                                    |

|    |                                                                           |
|----|---------------------------------------------------------------------------|
| 25 | CAACATCACCACAAGTCAACAAAGAACCTCTACCTTCACCAATGCTGTTCA<br>ACTTCCCAC          |
| 26 | TAAGTATATAATATTagaaggcttcgcatagtcGTTTTAGAGCTAGAA                          |
| 27 | TTCTAGCTCTAAAACtgactatgacgaagccttctAATATTATATACTTA                        |
| 28 | TAAGTATATAATATTatataattttacatcgaatGTTTTAGAGCTAGAA                         |
| 29 | TTCTAGCTCTAAAACattcgatgtaaaaattatatAATATTATATACTTA                        |
| 30 | GTATACCTTTGAAGACACATCATCAGCC <u>TTAAGG</u> TATGGTCATAGCGAGAG<br>AAGC      |
| 31 | <i>TTTCTGTTCCGGTAACCGCGAAGGCTTCGTCATAGTCAGGATTTTTGTCACGAG<br/>GTTTTGG</i> |
| 32 | <i>CCCTTTCGGGGCGCGCCGATATATCAATATATCATTATATCAATATATCAAG<br/>ATATC</i>     |
| 33 | GCTTCTCTCGCTATGACCATAC <u>CTTAAGG</u> CTGATGATGTGTCTTCAAAGGTA<br>TAC      |
| 34 | CTTATGACGTACCTGATTATGCAC                                                  |
| 35 | GTAGACCCCATTTGTGAGTACATAAATATATTATATAAACTAGACTAGG                         |

995 **SUPPLEMENTAL FIGURE LEGENDS**

996 **Supplemental Figure 1: Full length blots for Figure 1A- RBC contain TRiC subunits in the**  
997 **cytosolic fraction.** As described in Figure 1, lysates from uninfected RBC (U), trophozoite-stage  
998 infected RBC (I) or saponin isolated parasites (P) were extracted with RIPA buffer and probed  
999 with antibodies against human TRiC subunits A)  $\alpha$ , B)  $\beta$ , C)  $\delta$ , D)  $\zeta$  and E)  $\theta$ . PfEF-1 $\alpha$  is a  
1000 cytosolic parasite protein. Equivalent fractions were loaded in all blots. Immunoblots are  
1001 representative of two-four independent experiments. Marker bands are in kDa.

1002

1003 **Supplemental Figure 2: Full length blot for GFP-tagged PfTRiC subunits.** As described in  
1004 Figure 3, ectopic expression of GFP-tagged PfTRiC subunits was under the control of the strong,  
1005 constitutive HSP86 promoter. Dd2 and 3D7 are parent parasite lines. No ~27 kDa GFP 'core' is  
1006 observed. Equivalent fractions were loaded in all blots. Marker bands are in kDa.

1007

1008 **Supplemental Figure 3: Release of hemoglobin into the supernatant fraction upon TetO**

1009 **treatment.** The activity of TetO was confirmed by visually observing release of hemoglobin into

1010 the supernatant fraction. This is also clear in immunoblots as the abundant hemoglobin monomer

1011 cross-reacts (independent of the antibodies used) during the Western blotting procedure. Infected

1012 RBC samples (T = total sample) were fractionated with 1 HU of TetO (20 min, 37 °C) or 0.05 %

1013 saponin (Sap; 20 s, room temperature). PfHAD1 is a soluble parasite protein, remaining in the

1014 saponin- and TetO-pellet (P) fractions, whereas hemoglobin is detected in the saponin- and

1015 TetO-supernatant (SN) fractions. Equivalent fractions were loaded in all blots. Marker bands are

1016 in kDa. This representative blot relates to data presented in Figure 3B panel i).

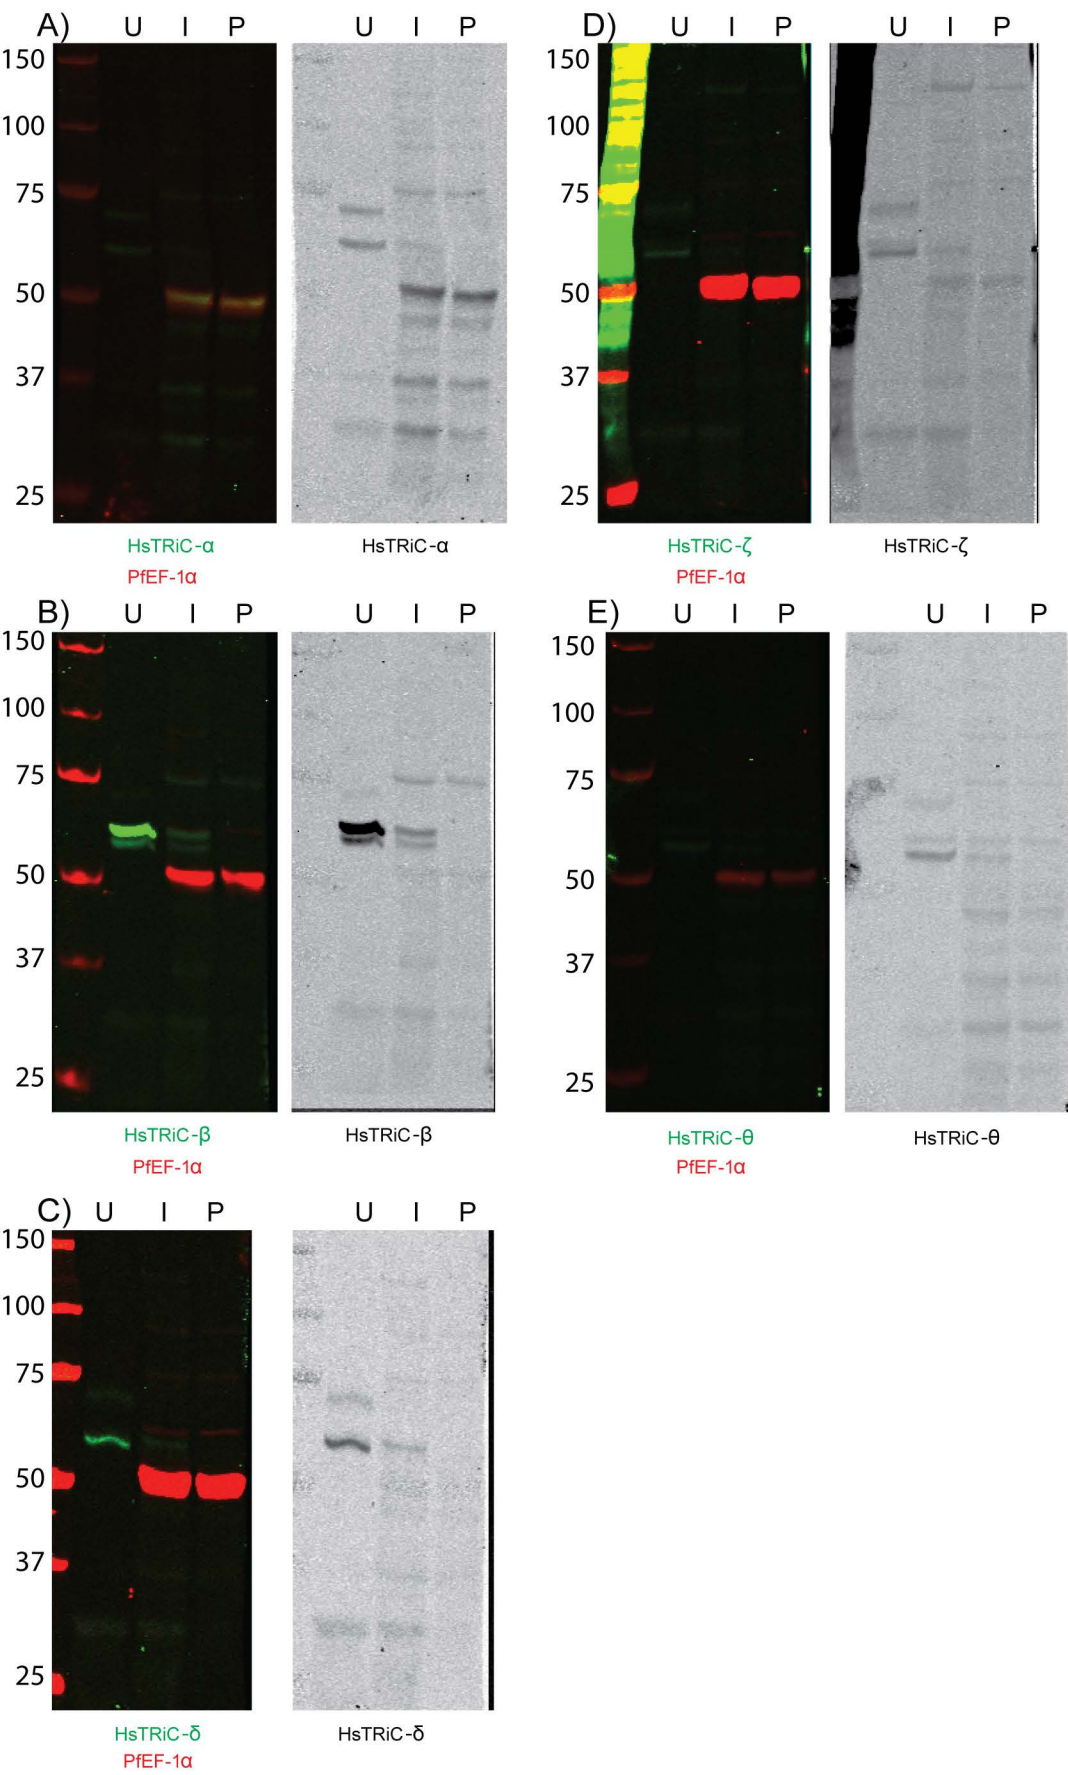

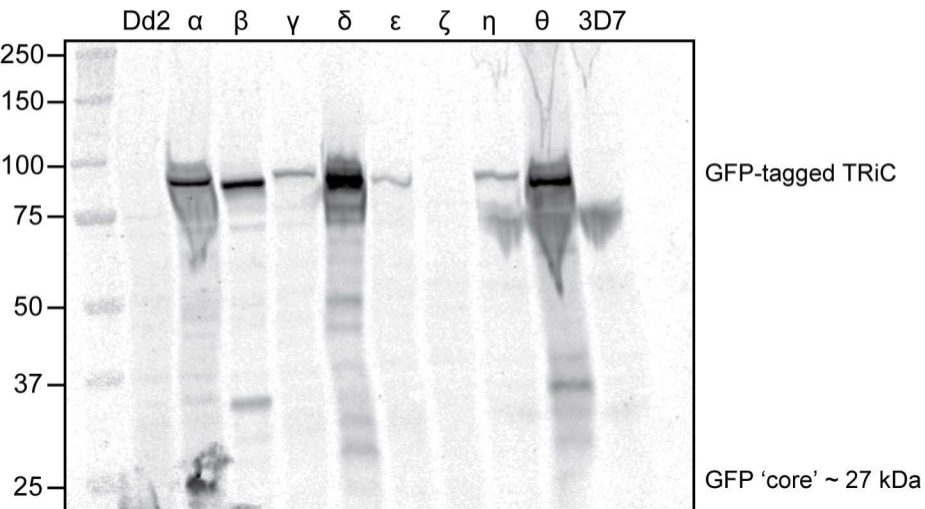

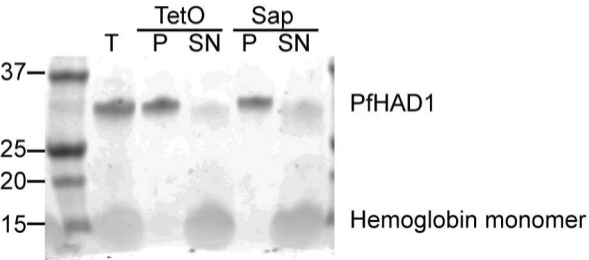

Supplement: NIHMS840887-supplement-01.pdf [file NIHMS840887-supplement-01.pdf]
